# Supplementary material
Source: publisher site journal article supplement (https://www.spandidos-publications.com/8087/downloadSupplementary)
Supplement: Supplementary file 1 [file downloadSupplementary]

## Sheet: 附表19
Table SIX. Comparative analysis of chemotherapeutic drug sensitivity by risk group.
Sample	RiskGroup	RDEA119	BI.2536	FTI.277	WZ.1.84	PHA.665752	Parthenolide	Docetaxel	PLX4720
ICC001G	L	1.96415	-1.44086	3.61967	5.54435	4.69051	5.01495	-5.45806	4.98687
ICC002G	L	2.38946	-2.14742	4.02842	5.69947	4.67497	4.84655	-4.99682	5.49148
ICC003G	L	2.64139	-2.13357	3.98382	5.45611	4.80831	4.90901	-5.05907	5.65963
ICC005G	H	2.26498	-1.76268	3.58035	5.18429	4.79999	5.06136	-5.71201	4.66379
ICC006G	L	2.85812	-1.38706	3.68375	6.22367	4.97009	5.12861	-4.55806	5.14468
ICC008G	L	2.67669	-1.31075	3.59919	5.56959	5.09023	5.36556	-4.48331	5.01686
ICC009G	L	2.44724	-1.66802	3.60965	5.2632	4.87952	5.06902	-5.37549	5.18455
ICC011G	L	3.66832	-1.30899	3.75862	5.55758	4.93731	5.14994	-4.97538	5.53458
ICC012G	H	1.64398	-1.7959	3.365	4.90407	4.64001	4.69189	-6.1314	4.78754
ICC013G	L	1.83559	-1.57515	3.53427	6.01152	4.83224	4.8862	-4.4777	5.17634
ICC015G	H	1.24901	-1.70532	3.52407	5.38089	4.78867	5.0228	-5.55358	5.15772
ICC016G	L	3.00253	-1.89935	3.70562	6.74215	5.04838	4.96157	-5.26025	4.82115
ICC018G	L	2.6695	-1.75204	3.65178	6.07242	4.82723	4.82679	-5.84213	5.18173
ICC019G	L	1.90123	-2.18253	3.63036	5.40486	4.56054	4.51786	-6.55684	5.55826
ICC020G	L	1.46857	-1.36004	3.65982	5.51761	4.73202	4.70622	-5.75981	4.82744
ICC021G	L	3.25005	-1.38239	3.65306	5.87035	4.8172	5.29785	-5.6281	5.19985
ICC022G	L	3.81022	-1.04525	3.74175	5.57862	4.79443	5.28687	-5.21513	4.95853
ICC023G	H	-0.290217	-2.50889	3.24555	4.94473	4.71627	5.14004	-5.59068	4.10593
ICC024G	L	3.00364	-1.42328	3.72781	5.81175	4.78116	5.20167	-4.92074	5.22498
ICC027G	L	1.90626	-1.18492	3.95553	5.94124	4.70383	4.532	-5.90945	5.01715
ICC028G	L	2.99825	-1.32108	3.63322	5.85122	4.90337	5.30797	-5.07822	4.83661
ICC031G	L	3.01335	-1.69781	3.65044	6.08012	4.76046	5.27714	-4.31459	4.7785
ICC034G	L	2.75773	-1.26323	3.82139	5.41956	4.96143	4.84466	-5.1491	4.97609
ICC037G	H	2.24735	-2.51891	3.97435	5.69345	4.84947	4.77949	-5.86562	5.31052
ICC039G	H	2.51403	-1.45979	3.70927	5.44063	4.94665	4.9077	-5.20505	5.12822
ICC040G	L	2.55816	-1.73534	3.78352	5.19193	4.79341	4.907	-6.15099	5.05302
ICC041G	H	2.25807	-1.59023	3.47333	5.27415	4.74845	4.93965	-5.61178	4.77767
ICC044G	L	2.74259	-1.53385	3.73479	5.72068	4.89732	5.10404	-4.80266	5.08214
ICC046G	H	2.31442	-1.87271	3.14124	5.20914	4.72682	4.76907	-6.11651	4.75769
ICC047G	H	2.14494	-1.72029	3.56277	5.3863	4.94905	4.82588	-5.33849	4.80573
ICC049G	L	3.04474	-1.41853	3.88293	5.28423	5.03597	5.31105	-5.06203	4.85985
ICC051G	L	2.45406	-1.26133	3.74898	5.52157	4.91067	4.91634	-5.5291	4.95983
ICC052G	H	1.88382	-1.74865	3.26789	6.03346	4.86426	4.71954	-4.91383	4.66284
ICC053G	L	1.69761	-1.73056	3.72239	5.56701	4.77482	4.77625	-6.32408	4.7468
ICC055G	L	1.61873	-1.78708	3.85747	5.63294	4.84998	4.72065	-5.97522	4.64176
ICC056G	H	2.17377	-1.55124	3.67355	5.81857	4.96702	4.98335	-4.83871	5.02789
ICC057G	L	2.16302	-1.71235	3.56916	4.96441	4.82173	4.84074	-5.50628	4.8957
ICC058G	H	1.9811	-1.8855	3.68289	5.38852	4.546	4.73026	-6.14729	4.38819
ICC059G	L	2.04435	-1.73454	3.48431	5.17203	4.72458	5.08299	-5.40385	4.89476
ICC061G	L	1.57022	-1.95407	3.58314	4.93261	4.86855	4.86616	-5.36633	4.57716
ICC063G	L	2.17643	-1.3823	3.82251	5.85688	4.86082	5.15655	-5.28018	5.0053
ICC064G	H	1.36149	-1.95826	3.60863	5.01954	4.52911	4.76377	-5.57489	4.54669
ICC065G	L	1.88186	-1.36993	3.50009	5.73267	4.84239	4.93446	-5.69142	4.28941
ICC067G	H	1.33903	-1.73214	3.55861	5.62835	4.77354	4.54654	-6.39148	4.26297
ICC068G	L	1.84387	-1.40983	3.60155	5.86451	4.9125	4.97247	-5.50985	4.93143
ICC071G	H	1.91537	-1.50619	4.19238	6.18484	4.79356	4.83276	-5.32773	6.08202
ICC072G	L	2.49771	-1.76502	3.76059	5.19947	4.95313	5.0005	-5.7454	5.28761
ICC073G	L	2.70709	-1.17533	3.55149	5.73316	4.89731	5.19076	-5.25974	5.12923
ICC074G	L	2.99998	-1.0884	3.73258	6.2062	4.81239	5.16928	-4.50723	5.20631
ICC075G	L	2.53054	-1.29327	3.81122	5.70945	4.98251	5.18668	-4.94601	5.20513
ICC077G	H	2.19615	-2.01358	3.73855	5.43083	4.63821	4.61379	-5.7158	4.8273
ICC079G	L	3.49947	-1.86811	3.92849	6.24708	4.87832	5.45381	-4.54393	5.1174
ICC081G	H	1.6321	-2.32677	3.69352	4.71874	4.68785	4.99208	-5.53887	5.1145
ICC082G	H	1.95536	-1.88159	3.43647	5.53743	4.71671	4.90296	-6.58406	4.22626
ICC086G	H	1.67239	-1.90006	3.06574	5.04665	4.68361	4.86445	-6.22088	5.23759
ICC087G	L	2.48842	-1.43399	3.52889	5.72397	4.9549	5.16426	-5.22889	5.09089
ICC091G	L	3.59075	-1.49493	3.73685	5.62854	4.9781	5.40978	-4.38936	5.14192
ICC092G	H	1.45969	-1.79526	3.32896	4.62733	4.70634	4.67576	-6.31486	4.68428
ICC093G	H	1.81365	-1.46739	3.67624	5.37062	4.739	4.85434	-5.09716	5.01967
ICC094G	L	2.13936	-1.91195	3.63221	5.39471	4.94364	5.06619	-5.22806	5.03866
ICC095G	L	3.66888	-1.50522	3.70482	5.06556	4.96874	5.06281	-5.18509	5.46125
ICC096G	H	0.315486	-1.73285	2.87815	5.39587	4.71567	4.82504	-5.19394	3.91594
ICC097G	H	2.93053	-1.70383	3.77224	5.08644	5.07056	5.1053	-5.27956	4.97505
ICC098G	L	1.50809	-1.44844	3.68665	5.39319	4.73921	4.70727	-6.09244	4.99093
ICC099G	H	2.31534	-1.48931	3.566	5.54173	4.75959	4.99604	-5.7331	4.9639
ICC104G	L	4.44307	-1.3727	3.85943	5.51016	5.06572	5.46912	-4.33839	5.33169
ICC106G	L	2.74763	-0.645959	3.99304	6.48059	4.75511	4.976	-4.75416	5.53797
ICC107G	L	1.74677	-1.49536	3.75524	5.66622	4.77172	4.89265	-5.13235	5.11975
ICC110G	L	1.55753	-1.68076	3.48212	4.91766	4.71029	4.70958	-6.48168	4.85664
ICC111G	H	1.13916	-1.75051	3.39223	5.09375	4.71452	4.57692	-5.87968	4.82212
ICC112G	H	2.34203	-1.48113	3.43139	5.53758	4.79237	5.25286	-5.71995	5.09937
ICC113G	H	1.06267	-1.8938	3.29201	4.97274	4.57464	4.86586	-5.96399	4.68055
ICC116G	L	2.4057	-1.24796	3.77984	5.63228	4.84425	5.05275	-5.22322	5.00713
ICC118G	L	3.71293	-1.10562	3.76462	5.72011	4.94879	5.2362	-4.46579	5.52133
ICC120G	L	2.2245	-1.11978	3.7766	5.62223	4.69748	5.04203	-5.15804	5.17648
